# Supplementary material for: Blood Circulating CD133+ Extracellular Vesicles Predict Clinical Outcomes in Patients with Metastatic Colorectal Cancer
Source: MDPI journal article supplement (doi:10.3390/cancers14051357), 2022-03-07
Supplement: s1 [file s1]

# Blood Circulating CD133+ Extracellular Vesicles Predict Clinical Outcomes in Patients with Metastatic Colorectal Cancer

Davide Brocco , Pasquale Simeone , Davide Buca , Pietro Di Marino , Michele De Tursi , Antonino Grassadonia , Laura De Lellis , Maria Teresa Martino , Serena Veschi , Manuela Iezzi , Simone De Fabritiis , Marco Marchisio , Sebastiano Miscia , Alessandro Cama , Paola Lanuti and Nicola Tinari

**Table S1.** mCRC patients' characteristics.

| Variable                       | n=54 (%)  |
|--------------------------------|-----------|
| Age (%)                        |           |
| ≥65                            | 35 (64.8) |
| <65                            | 19 (35.2) |
| Sex (%)                        |           |
| Male                           | 39 (72.2) |
| Female                         | 15 (27.8) |
| ECOG PS                        |           |
| 0                              | 31 (57.4) |
| 1-2                            | 23 (42.6) |
| Primary Tumor Location         |           |
| Right-sided Colon              | 11 (20.4) |
| Left-sided Colon               | 22 (40.7) |
| Rectum                         | 21 (38.9) |
| Tumor grading                  |           |
| 1                              | 2 (3.7)   |
| 2                              | 38 (74.5) |
| 3                              | 11 (21.6) |
| Unknown                        | 3 (5.6)   |
| RAS/B-RAF mutations            |           |
| K-RAS mutated                  | 22 (40.7) |
| N-RAS mutated                  | 2 (3.7)   |
| B-RAF mutated                  | 2 (3.7)   |
| Wild type                      | 27 (50.0) |
| Unknown                        | 1 (1.9)   |
| Number of metastatic sites (%) |           |
| 1                              | 25 (46.3) |
| 2                              | 20 (37.0) |
| ≥3                             | 9 (16.7)  |
| Liver Metastasis               |           |
| Yes                            | 15 (27.8) |
| No                             | 39 (72.2) |
| Lung Metastasis                |           |
| Yes                            | 32 (59.3) |

|                                      |           |
|--------------------------------------|-----------|
| No                                   | 22 (40.7) |
| Line of therapy                      |           |
| 1                                    | 36 (66.7) |
| 2                                    | 13 (24.1) |
| ≥3                                   | 5 (9.3)   |
| Systemic Therapy                     |           |
| Chemotherapy + Cetuximab/Panitumumab | 17 (31.5) |
| Chemotherapy + Bevacizumab           | 18 (33.3) |
| Chemotherapy + Aflibercept           | 2 (3.7)   |
| Chemotherapy                         | 10 (18)   |
| Regorafenib                          | 3 (5.6)   |
| Cetuximab/Panitumumab                | 4 (7.4)   |

Table S2. List of flow cytometry specificities and reagents.

| Reagent*                      | Fluorochrome/Reagent | Vendor          | Clone   | Cat. Number | Volume per test (μl) |
|-------------------------------|----------------------|-----------------|---------|-------------|----------------------|
| Lipophilic Cationic Dye (LCD) | -                    | BD Biosciences  | -       | 626267      | 0.5                  |
| Phalloidin-FITC               | FITC                 | BD Biosciences  | -       | 626267      | 0.5                  |
| CD133/2                       | PE                   | Miltenyi Biotec | 293C3   | 130-113-186 | 1                    |
| EpCAM                         | PerCP-Cy5.5          | BD Biosciences  | (EBA-1) | 347199      | 5                    |
| CD45                          | BV510                | BD Biosciences  | HI30    | 626266      | 5                    |

Table S3. Spearman rank correlation coefficients (p-value) between blood circulating EVs and selected clinical-pathological factors in patients with CRC (n=54).

|            |                         | ECOG PS | Sex  | Age   | Primary Tumor Location | Tumor Grading <sup>a</sup> | K-RAS mutation | Liver metastasis | Lung metastasis | Number of metastatic sites |
|------------|-------------------------|---------|------|-------|------------------------|----------------------------|----------------|------------------|-----------------|----------------------------|
| Total EVs  | Correlation Coefficient | 0.11    | 0.06 | 0.15  | -0.25                  | -0.01                      | 0.05           | -0.17            | 0.13            | -0.12                      |
|            | Sig. (2-tailed)         | 0.42    | 0.68 | 0.28  | 0.07                   | 0.95                       | 0.71           | 0.21             | 0.36            | 0.38                       |
| CD133+ EVs | Correlation Coefficient | 0.12    | 0.09 | -0.06 | -0.09                  | 0.01                       | 0.06           | 0.03             | -0.23           | -0.05                      |
|            | Sig. (2-tailed)         | 0.38    | 0.51 | 0.68  | 0.53                   | 0.93                       | 0.66           | 0.86             | 0.10            | 0.71                       |
| EPCAM+ EVs | Correlation Coefficient | 0.17    | 0.03 | -0.03 | -0.06                  | -0.13                      | 0.13           | -0.06            | -0.07           | -0.17                      |
|            | Sig. (2-tailed)         | 0.22    | 0.86 | 0.86  | 0.67                   | 0.36                       | 0.34           | 0.69             | 0.63            | 0.23                       |

a) Histologic tumor grading was evaluated as recommended by AJCC (8th edition of AJCC-TNM).

Table S4. Comparison of EV concentration in blood samples collected before first line systemic treatment (n=36) and after at least one line of therapy (n=41).

|                               | Treatment Naïve        | Post-treatment         | p-value |
|-------------------------------|------------------------|------------------------|---------|
| Median Total EVs/μl (95% CI)  | 5530.0 (4431.0-6538.0) | 3626.0 (2772.0-5362.0) | 0.18    |
| Median CD133+ EVs/μl (95% CI) | 56.1 (35.0-111.3)      | 37.2 (14.4-95.0)       | 0.15    |
| Median EPCAM EVs/μl (95% CI)  | 50.9 (34.2-72.2)       | 53.2 (28.0-73.5)       | 0.94    |

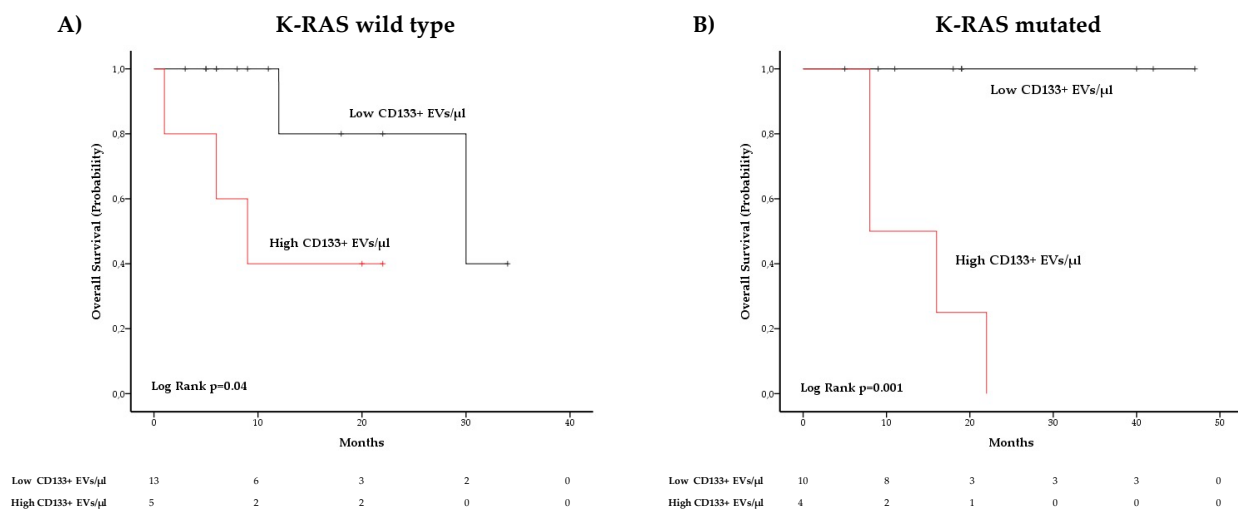

**Figure S1.** Kaplan-Meier (KM) curves showing the relationship between overall survival and blood concentration of CD133+ EVs in patients with K-RAS wild type **(A)** and K-RAS mutated **(B)** colorectal tumors.

#### A) Total EVs

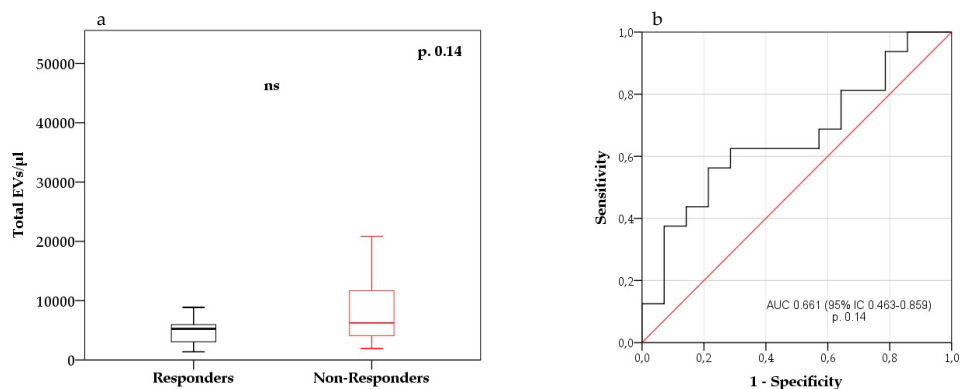

#### B) EPCAM+ EVs

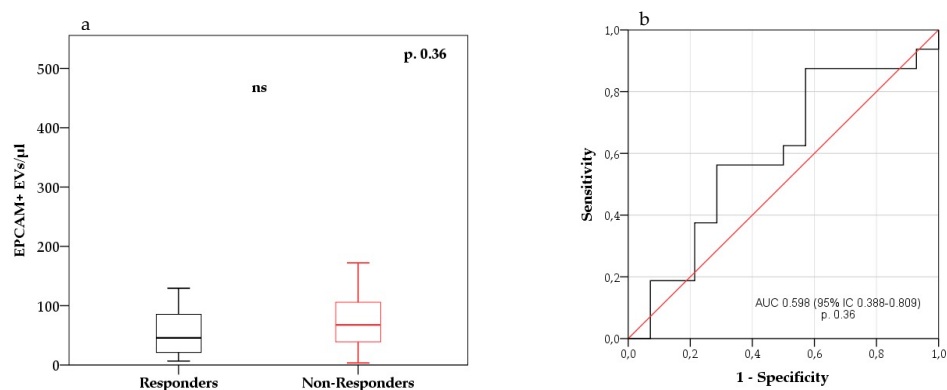

**Figure S2.** Relationship between treatment response and blood circulating total and EPCAM+ EV concentration at treatment baseline. **Panel A:** (a) Box plot diagram and (b) Receiver operating curve comparing blood concentration of total EVs between responders and non-responders. **Panel B:** (a)

Box plot diagram and (b) Receiver operating curve analyzing difference in blood concentration of EPCAM+ EVs between responders and non-responders.

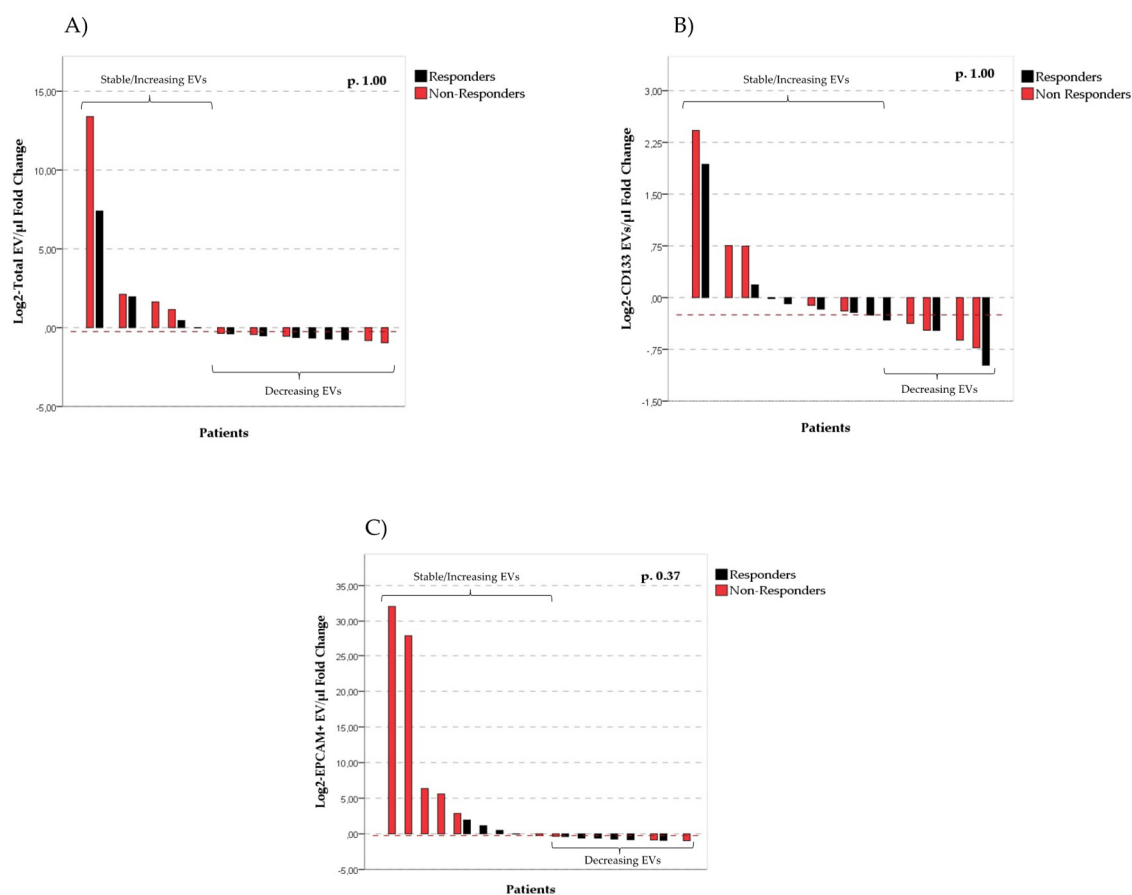

**Figure S3.** Waterfall plots depicting distributions of responders and non-responders according to variations in blood concentration of total (A), CD133+ (B) and EPCAM+ (C) EVs during treatment.
